# Supplementary material for: Associations between Urban Green Spaces and Health are Dependent on the Analytical Scale and How Urban Green Spaces are Measured
Source: Int J Environ Res Public Health. 2019 Feb 16;16(4):578. doi: 10.3390/ijerph16040578 (PMC6406785; doi:10.3390/ijerph16040578)
Supplement: Supplementary file 1 [file ijerph-16-00578-s001.pdf]

## Supplementary Materials for paper

Associations between urban green spaces and health are dependent on the analytical scale and how urban green spaces are measured

### Associations between vegetation cover and mental health

For circular buffers, the associations of the amount of vegetation cover with mental health was shown only at scales from 600 m to 2000 m (Table S1). The strongest association with mental health (OR=1.033, 95% CI: 1.009-1.059,  $p<0.01$ ) was found at 1200 m and 1600 m. For nested buffers, only vegetation cover at buffers with radius ranging from 400 m to 1600 m were significantly associated with mental health and the strongest association (OR=1.028, 95% CI: 1.006-1.051,  $p<0.05$ ) was found at 800-1200 m. For vegetation cover at network buffers, the significant associations were found at the scales ranging from 1200 m to 2400 m. The strongest association was found at 1600 m (OR=1.034, 95% CI: 1.007-1.062,  $p<0.05$ ) and 2000 m (OR=1.034, 95% CI: 1.006-1.064,  $p<0.05$ ).

**Table S1.** Binary logistic regression for mental health and vegetation cover at different buffers

| Type of spatial scale | Buffer size (m), fully adjusted <sup>1</sup> | Odds Ratio | 95% C.I. for Odds Ratio |       | p-value |
|-----------------------|----------------------------------------------|------------|-------------------------|-------|---------|
|                       |                                              |            | Lower                   | Upper |         |
| Circular buffers      | 50                                           | 0.996      | 0.980                   | 1.012 | 0.605   |
|                       | 100                                          | 1.001      | 0.984                   | 1.020 | 0.872   |
|                       | 200                                          | 1.014      | 0.993                   | 1.035 | 0.193   |
|                       | 300                                          | 1.015      | 0.994                   | 1.037 | 0.165   |
|                       | 400                                          | 1.017      | 0.997                   | 1.039 | 0.107   |
|                       | 500                                          | 1.020      | 0.999                   | 1.043 | 0.066   |
|                       | 600                                          | 1.023*     | 1.002                   | 1.046 | 0.039   |
|                       | 700                                          | 1.025*     | 1.004                   | 1.049 | 0.025   |
|                       | 800                                          | 1.028*     | 1.006                   | 1.051 | 0.016   |
|                       | 1000                                         | 1.031**    | 1.008                   | 1.056 | 0.009   |
|                       | 1200                                         | 1.033**    | 1.009                   | 1.059 | 0.008   |
|                       | 1600                                         | 1.033**    | 1.009                   | 1.059 | 0.009   |
|                       | 2000                                         | 1.030*     | 1.006                   | 1.056 | 0.015   |
|                       | 2400                                         | 1.024      | 1.000                   | 1.049 | 0.056   |
|                       | 2800                                         | 1.017      | 0.993                   | 1.042 | 0.178   |
| Nested buffers        | 0-400                                        | 1.017      | 0.997                   | 1.039 | 0.107   |
|                       | 400-800                                      | 1.026*     | 1.006                   | 1.048 | 0.013   |
|                       | 800-1200                                     | 1.028*     | 1.006                   | 1.051 | 0.014   |
|                       | 1200-1600                                    | 1.023*     | 1.002                   | 1.044 | 0.032   |
|                       | 1600-2000                                    | 1.018      | 0.999                   | 1.039 | 0.074   |
|                       | 2000-2400                                    | 1.005      | 0.985                   | 1.025 | 0.622   |
|                       | 2400-2800                                    | 0.997      | 0.978                   | 1.017 | 0.772   |
| Network buffers       | 400                                          | 1.011      | 0.990                   | 1.032 | 0.317   |
|                       | 800                                          | 1.018      | 0.995                   | 1.042 | 0.128   |

|                                                                                                                                                                                                                      |      |        |       |       |       |
|----------------------------------------------------------------------------------------------------------------------------------------------------------------------------------------------------------------------|------|--------|-------|-------|-------|
|                                                                                                                                                                                                                      | 1000 | 1.022  | 0.999 | 1.048 | 0.067 |
|                                                                                                                                                                                                                      | 1200 | 1.026* | 1.002 | 1.052 | 0.041 |
|                                                                                                                                                                                                                      | 1600 | 1.034* | 1.007 | 1.062 | 0.015 |
|                                                                                                                                                                                                                      | 2000 | 1.034* | 1.006 | 1.064 | 0.018 |
|                                                                                                                                                                                                                      | 2400 | 1.028* | 1.001 | 1.058 | 0.050 |
|                                                                                                                                                                                                                      | 2800 | 1.029  | 1.001 | 1.060 | 0.051 |
| 1. Adjusted for level of health problems, community involvement, housing ownership, BMI, gender, level of indoor physical activities, household income, smoking, residential status, children number, age, ethnicity |      |        |       |       |       |
| ***. $p \leq 0.001$ ; **. $p \leq 0.01$ ; *. $p \leq 0.05$                                                                                                                                                           |      |        |       |       |       |

### Association between canopy cover and mental health

The associations between canopy cover and mental health were significant at all the buffers except for the circular buffers of 50 m, 100 m, and nested buffer of 2400-2800 m (Table S2). The strongest association for circular buffers (OR=1.046, 95% CI: 1.022-1.072,  $p < 0.001$ ) was found at 1000 m. For nested buffers, the strongest relationship (OR=1.044, 95% CI: 1.021-1.069,  $p < 0.001$ ) was found at 400-800 m. All the network buffers showed significant associations between canopy cover and mental health and the strongest association (OR=1.060, 95% CI: 1.032-1.091,  $p < 0.001$ ) was found at 2000 m.

**Table S2.** Binary logistic regression for mental health and canopy cover at different buffers

| Type of spatial scale | Buffer size (m), fully adjusted <sup>1</sup> | Odds Ratio | 95% C.I. for Odds Ratio |       | p-value |
|-----------------------|----------------------------------------------|------------|-------------------------|-------|---------|
|                       |                                              |            | Lower                   | Upper |         |
| Circular buffers      | 50                                           | 1.008      | 0.990                   | 1.027 | 0.398   |
|                       | 100                                          | 1.017      | 0.997                   | 1.039 | 0.109   |
|                       | 200                                          | 1.030*     | 1.007                   | 1.055 | 0.014   |
|                       | 300                                          | 1.031**    | 1.008                   | 1.056 | 0.010   |
|                       | 400                                          | 1.035**    | 1.012                   | 1.060 | 0.004   |
|                       | 500                                          | 1.040***   | 1.017                   | 1.066 | 0.001   |
|                       | 600                                          | 1.042***   | 1.019                   | 1.068 | 0.001   |
|                       | 700                                          | 1.044***   | 1.020                   | 1.070 | 0.000   |
|                       | 800                                          | 1.045***   | 1.022                   | 1.072 | 0.000   |
|                       | 1000                                         | 1.046***   | 1.022                   | 1.072 | 0.000   |
|                       | 1200                                         | 1.044***   | 1.021                   | 1.070 | 0.000   |
|                       | 1600                                         | 1.042***   | 1.020                   | 1.067 | 0.000   |
|                       | 2000                                         | 1.038***   | 1.017                   | 1.061 | 0.001   |
|                       | 2400                                         | 1.033**    | 1.013                   | 1.055 | 0.002   |
|                       | 2800                                         | 1.029**    | 1.009                   | 1.051 | 0.005   |
| Nested buffers        | 0-400                                        | 1.035**    | 1.012                   | 1.060 | 0.004   |
|                       | 400-800                                      | 1.044***   | 1.021                   | 1.069 | 0.000   |
|                       | 800-1200                                     | 1.036***   | 1.016                   | 1.058 | 0.001   |
|                       | 1200-1600                                    | 1.033***   | 1.014                   | 1.054 | 0.001   |

|                                                                                                                                                                                                                                                                                    |           |          |       |       |       |
|------------------------------------------------------------------------------------------------------------------------------------------------------------------------------------------------------------------------------------------------------------------------------------|-----------|----------|-------|-------|-------|
|                                                                                                                                                                                                                                                                                    | 1600-2000 | 1.027**  | 1.009 | 1.046 | 0.004 |
|                                                                                                                                                                                                                                                                                    | 2000-2400 | 1.019*   | 1.002 | 1.038 | 0.034 |
|                                                                                                                                                                                                                                                                                    | 2400-2800 | 1.015    | 0.998 | 1.034 | 0.092 |
| Network buffers                                                                                                                                                                                                                                                                    | 400       | 1.032*   | 1.007 | 1.058 | 0.012 |
|                                                                                                                                                                                                                                                                                    | 800       | 1.040**  | 1.014 | 1.068 | 0.003 |
|                                                                                                                                                                                                                                                                                    | 1000      | 1.046*** | 1.019 | 1.075 | 0.001 |
|                                                                                                                                                                                                                                                                                    | 1200      | 1.051*** | 1.024 | 1.080 | 0.000 |
|                                                                                                                                                                                                                                                                                    | 1600      | 1.057*** | 1.029 | 1.087 | 0.000 |
|                                                                                                                                                                                                                                                                                    | 2000      | 1.060*** | 1.032 | 1.091 | 0.000 |
|                                                                                                                                                                                                                                                                                    | 2400      | 1.055*** | 1.028 | 1.085 | 0.000 |
|                                                                                                                                                                                                                                                                                    | 2800      | 1.053*** | 1.026 | 1.083 | 0.000 |
| 1. Adjusted for level of health problems, community involvement, housing ownership, BMI, gender, level of indoor physical activities, household income, smoking, residential status, children number, age, ethnicity<br>***. $p \leq 0.001$ ; **. $p \leq 0.01$ ; *. $p \leq 0.05$ |           |          |       |       |       |

### Association between park area and mental health

As shown in Table S3, park area at all the circular and nested buffers were not correlated with mental health. Parks at network buffers with the distance of 1200 m and 1600 m were significantly associated with mental health. The strongest association (OR=1.064, 95% CI: 1.008-1.124,  $p < 0.05$ ) was observed at 1600 m.

**Table S3.** Binary logistic regression for mental health and park area at different buffers

| Type of spatial scale | Buffer size (m), fully adjusted <sup>1</sup> | Odds Ratio | 95% C.I. for Odds Ratio |       | p-value |
|-----------------------|----------------------------------------------|------------|-------------------------|-------|---------|
|                       |                                              |            | Lower                   | Upper |         |
| Circular buffers      | 50                                           | 1.057      | 0.975                   | 1.211 | 0.286   |
|                       | 100                                          | 1.017      | 0.972                   | 1.081 | 0.535   |
|                       | 200                                          | 1.030      | 0.987                   | 1.088 | 0.229   |
|                       | 300                                          | 1.030      | 0.990                   | 1.081 | 0.184   |
|                       | 400                                          | 1.041      | 1.000                   | 1.093 | 0.072   |
|                       | 500                                          | 1.041      | 1.001                   | 1.090 | 0.062   |
|                       | 600                                          | 1.039      | 1.000                   | 1.087 | 0.068   |
|                       | 700                                          | 1.040      | 1.000                   | 1.087 | 0.066   |
|                       | 800                                          | 1.042      | 1.001                   | 1.091 | 0.058   |
|                       | 1000                                         | 1.043      | 1.001                   | 1.094 | 0.061   |
|                       | 1200                                         | 1.044      | 1.000                   | 1.097 | 0.067   |
|                       | 1600                                         | 1.031      | 0.988                   | 1.084 | 0.191   |
|                       | 2000                                         | 1.024      | 0.984                   | 1.074 | 0.283   |
|                       | 2400                                         | 1.021      | 0.982                   | 1.069 | 0.327   |
|                       | 2800                                         | 1.018      | 0.980                   | 1.065 | 0.385   |

|                                                                                                                                                                                                                                          |           |        |       |       |       |
|------------------------------------------------------------------------------------------------------------------------------------------------------------------------------------------------------------------------------------------|-----------|--------|-------|-------|-------|
| Nested buffers                                                                                                                                                                                                                           | 0-400     | 1.041  | 1.000 | 1.093 | 0.072 |
|                                                                                                                                                                                                                                          | 400-800   | 1.034  | 0.998 | 1.077 | 0.086 |
|                                                                                                                                                                                                                                          | 800-1200  | 1.030  | 0.993 | 1.075 | 0.142 |
|                                                                                                                                                                                                                                          | 1200-1600 | 1.008  | 0.976 | 1.047 | 0.647 |
|                                                                                                                                                                                                                                          | 1600-2000 | 1.009  | 0.980 | 1.044 | 0.561 |
|                                                                                                                                                                                                                                          | 2000-2400 | 1.011  | 0.981 | 1.047 | 0.507 |
|                                                                                                                                                                                                                                          | 2400-2800 | 1.008  | 0.977 | 1.045 | 0.627 |
| Network buffers                                                                                                                                                                                                                          | 400       | 1.040  | 0.987 | 1.095 | 0.141 |
|                                                                                                                                                                                                                                          | 800       | 1.049  | 0.992 | 1.108 | 0.093 |
|                                                                                                                                                                                                                                          | 1000      | 1.053  | 0.997 | 1.112 | 0.063 |
|                                                                                                                                                                                                                                          | 1200      | 1.055* | 1.001 | 1.112 | 0.046 |
|                                                                                                                                                                                                                                          | 1600      | 1.064* | 1.008 | 1.124 | 0.025 |
|                                                                                                                                                                                                                                          | 2000      | 1.049  | 0.995 | 1.106 | 0.076 |
|                                                                                                                                                                                                                                          | 2400      | 1.036  | 0.983 | 1.092 | 0.189 |
|                                                                                                                                                                                                                                          | 2800      | 1.009  | 0.962 | 1.057 | 0.724 |
| 1. Adjusted for level of health problems, community involvement, housing ownership, BMI, gender, level of indoor physical activities, household income, smoking, residential status, children number, age, ethnicity<br>*. $p \leq 0.05$ |           |        |       |       |       |
